# Supplementary material for: Estimating temporal likelihood of archaeological sites in prehistoric Denmark combining typochronological and radiocarbon data
Source: Research Square preprint supplement (doi:10.21203/rs.3.rs-5656593/v1), 2025-01-09
Supplement: Supplementary file 1 [file 4a5d2554fa66d0364742ae14.xlsx]

## Sheet: Tab1
Lab	Site ID	Years BP	SD
Toy-1	163	4580	20
Toy-2	497	4827	50
Toy-3	13	6169	36
Toy-4	336	5053	37
Toy-5	380	5097	29
Toy-6	284	6286	28

## Sheet: Tab2
Site ID	Start year BP	End year BP	Precision (years)	Coords
1	5500	5401	100	POINT (492315.1 6286799)
2	5700	5601	100	POINT (506130 6292635)
3	6600	6401	200	POINT (493754.1 6281580)
4	5900	5701	200	POINT (509319.4 6259776)
5	5800	5701	100	POINT (504972 6282930)
6	6800	6401	400	POINT (494868.1 6285960)

## Sheet: Tab3
id	Date-1	Bin-1	Date-2	Bin-2	Date-3	Bin-3
1	5429	(5.4e+03,5.6e+03]	5405	(5.4e+03,5.6e+03]	5470	(5.4e+03,5.6e+03]
2	5687	(5.6e+03,5.8e+03]	5680	(5.6e+03,5.8e+03]	5667	(5.6e+03,5.8e+03]
3	6425	(6.4e+03,6.6e+03]	6406	(6.4e+03,6.6e+03]	6545	(6.4e+03,6.6e+03]
4	5870	(5.8e+03,6e+03]	5773	(5.6e+03,5.8e+03]	5854	(5.8e+03,6e+03]
5	5751	(5.6e+03,5.8e+03]	5799	(5.6e+03,5.8e+03]	5771	(5.6e+03,5.8e+03]
6	6514	(6.4e+03,6.6e+03]	6726	(6.6e+03,6.8e+03]	6419	(6.4e+03,6.6e+03]
7	5956	(5.8e+03,6e+03]	5936	(5.8e+03,6e+03]	5940	(5.8e+03,6e+03]
8	5185	(5e+03,5.2e+03]	5161	(5e+03,5.2e+03]	5148	(5e+03,5.2e+03]
9	5589	(5.4e+03,5.6e+03]	5348	(5.2e+03,5.4e+03]	5379	(5.2e+03,5.4e+03]
10	5459	(5.4e+03,5.6e+03]	5418	(5.4e+03,5.6e+03]	5434	(5.4e+03,5.6e+03]

## Sheet: Tab4
id	start	end	precision	bin_4200	bin_4400	bin_4600	bin_4800	bin_4000
18	4800	4701	100	0	0	100	0	0
72	4900	4301	600	12	38	24	26	0
313	4900	4801	100	0	0	0	100	0
352	4900	4501	400	0	27	49	24	0
359	4600	4401	200	0	100	0	0	0
392	4700	4601	100	0	0	100	0	0
416	4900	3901	1000	16	18	8	7	26
439	4700	4601	100	0	0	100	0	0
449	4900	4501	400	0	26	48	26	0
456	4900	3901	1000	19	20	12	11	22
